# Supplementary material for: Systematic analysis of gene expression alterations and clinical outcomes of adenylate cyclase-associated protein in cancer
Source: PubMed Central journal article supplement (PMC5432330; doi:10.18632/oncotarget.16111), 2017-03-10
Supplement: oncotarget-08-27216-s001.pdf [file oncotarget-08-27216-s001.pdf]

## Systematic analysis of gene expression alterations and clinical outcomes of adenylate cyclase-associated protein in cancer

### Supplementary Materials

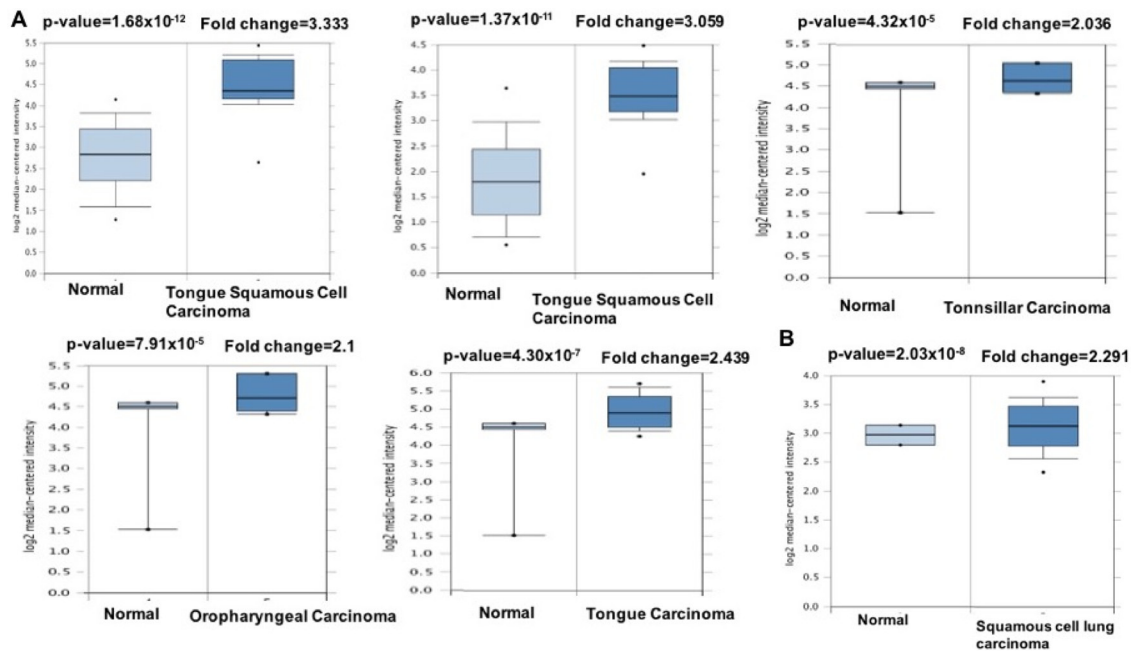

**Supplementary Figure 1: CAP1 gene analysis in Head-Neck and lung cancer (OncoPrint database).** The box plot comparing specific CAP1 expression in normal (left plot) and cancer tissue (right plot) was derived from OncoPrint database. The analysis was shown in Head-Neck carcinoma relative to normal Head-Neck (A), in lung carcinoma relative to normal lung (B).

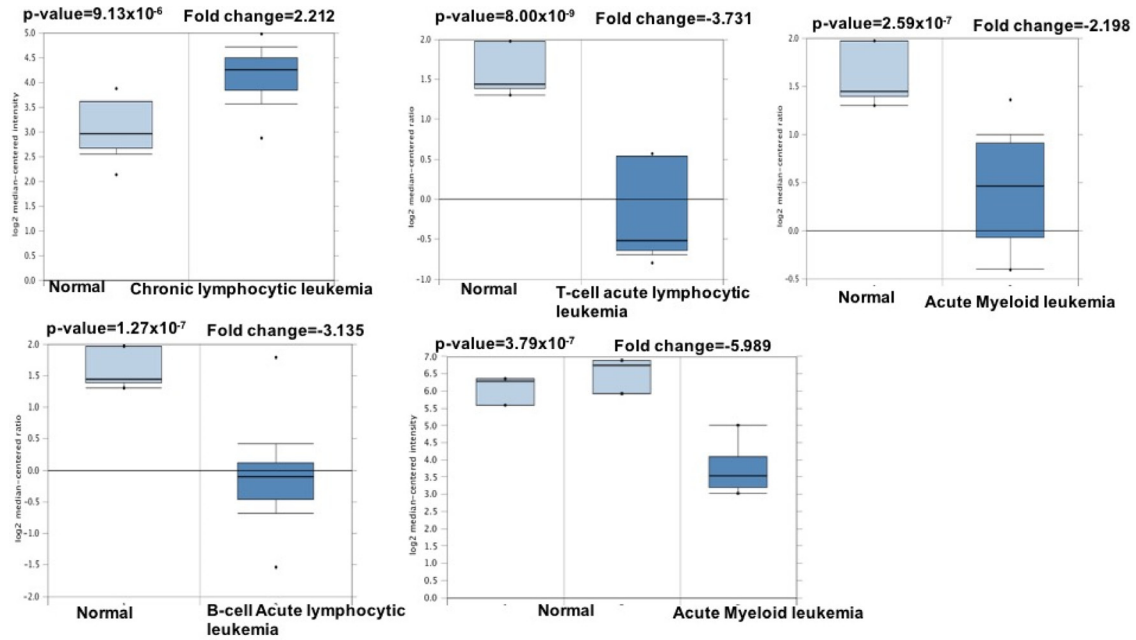

**Supplementary Figure 2: CAP1 gene analysis in Leukemia cancer (Oncomine database).** The box plot comparing specific CAP1 expression in normal (left plot) and cancer tissue (right plot) was derived from Oncomine database. The analysis was shown in leukemia carcinoma relative to normal tissue.

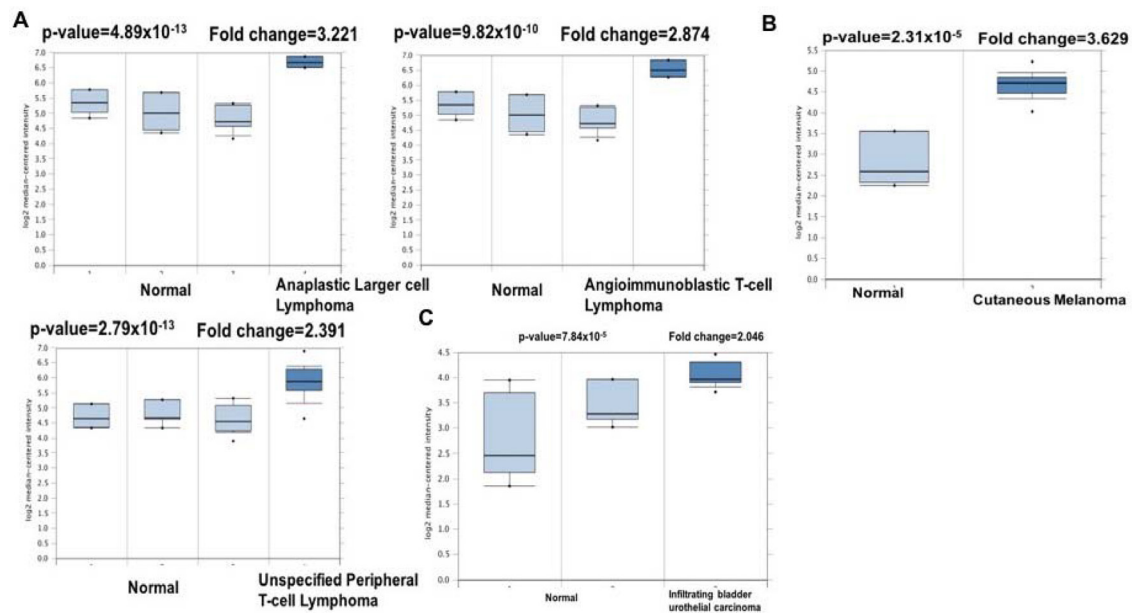

**Supplementary Figure 3: CAP1 gene analysis in Lymphoma, Melanoma and Bladder cancer (Oncomine database).** The box plot comparing specific CAP1 expression in normal (left plot) and cancer tissue (right plot) was derived from Oncomine database. The analysis was shown in Lymphoma carcinoma relative to normal tissue (A), in Melanoma relative to normal tissue (B), in Bladder cancer relative to normal bladder (C).

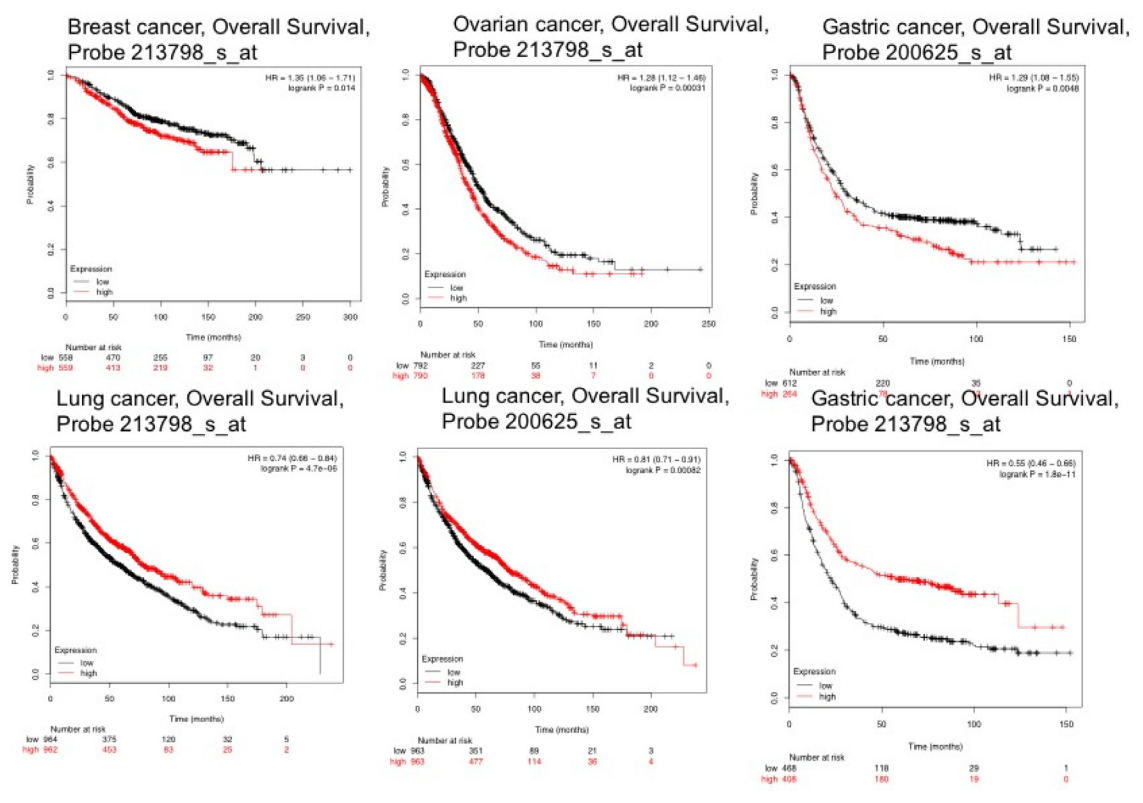

**Supplementary Figure 4: CAP1 genes in Breast, Ovarian, Gastric and Lung cancer (Kaplan-Meier Plotter).** The survival curve comparing the patient with high (red) and low (black) expression in breast, ovarian, gastric and lung cancer was plotted from Kaplan-Meier plotter database.

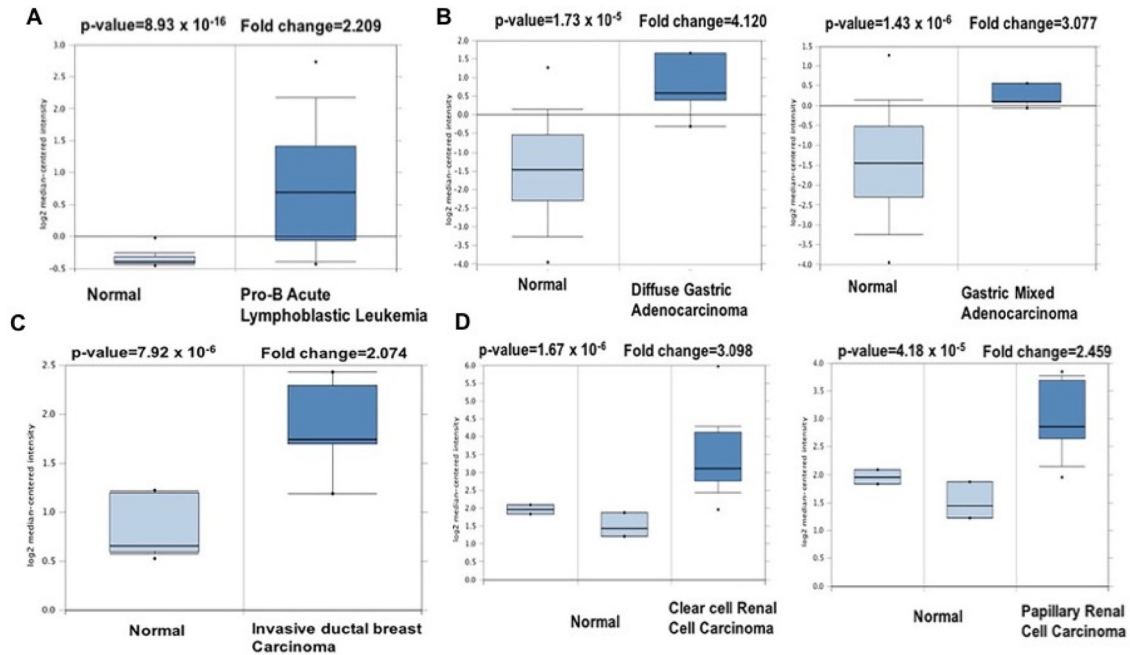

**Supplementary Figure 5: CAP2 gene analysis in Leukemia, Gastric, Breast and Renal cancer (Oncomine database).** The box plot comparing specific CAP2 expression in normal (left plot) and cancer tissue (right plot) was derived from Oncomine database. The analysis was shown in Leukemia relative to normal (A), in gastric carcinoma relative to normal gastric (B), in breast carcinoma relative to normal breast (C), in renal carcinoma relative to normal renal (D).

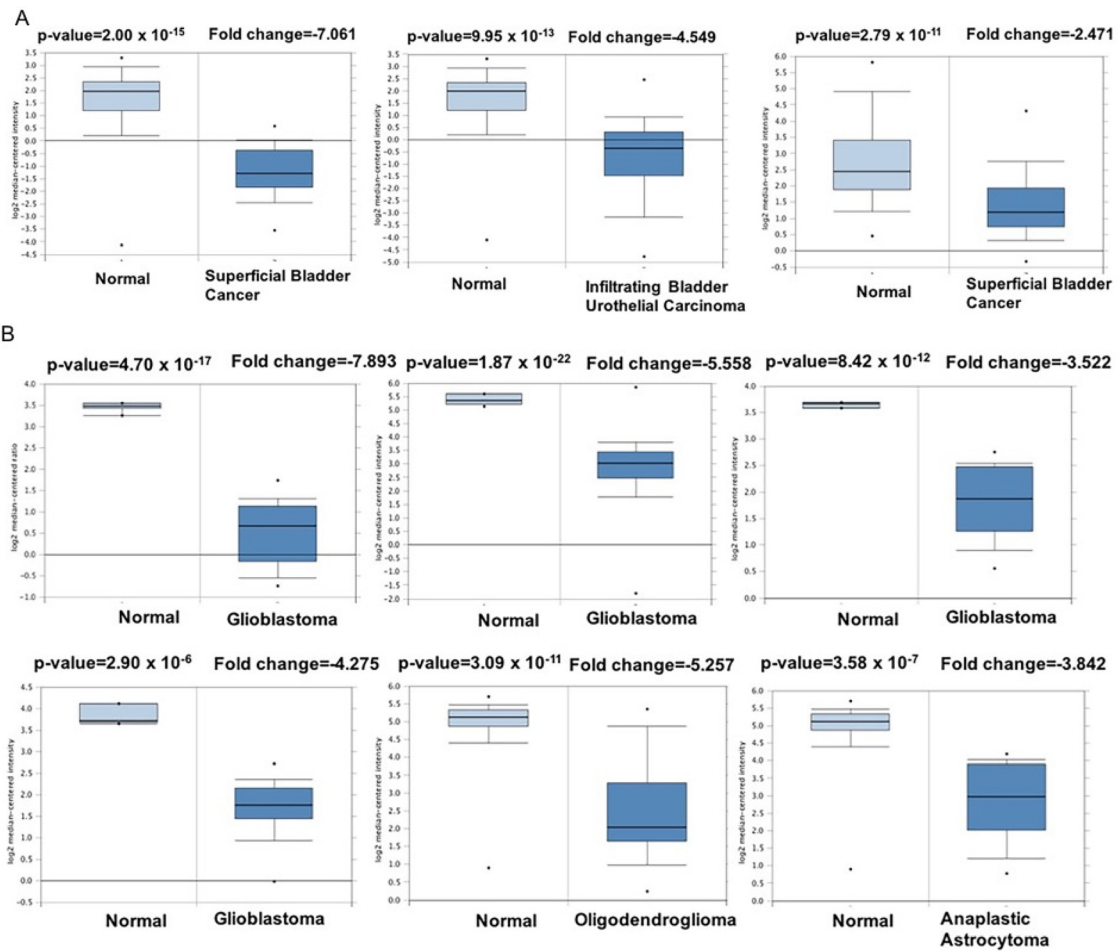

**Supplementary Figure 6: CAP2 gene analysis in Bladder and Renal cancer (Oncomine database).** The box plot comparing specific CAP2 expression in normal (left plot) and cancer tissue (right plot) was derived from Oncomine database. The analysis was shown in Bladder relative to normal bladder (**A**), in Glioblastoma relative to normal tissue (**B**).

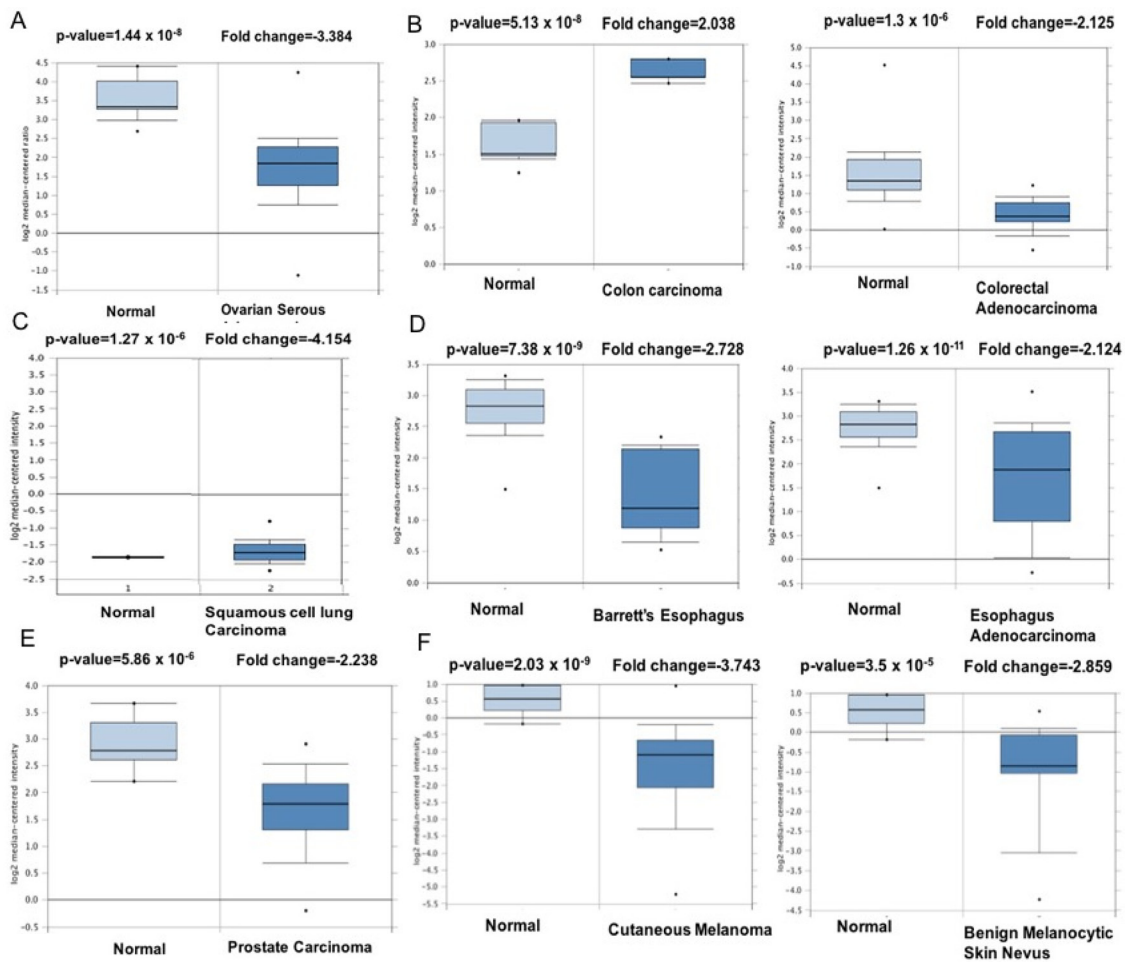

**Supplementary Figure 7: CAP2 gene analysis in Ovarian, Colon, Lung, Esophagus, Prostate and Melanoma cancer (Oncomine database).** The box plot comparing specific CAP2 expression in normal (left plot) and cancer tissue (right plot) was derived from Oncomine database. The analysis was shown in Ovarian relative to normal ovarian (A), in Colorectal relative to normal tissue (B), in Lung cancer relative to normal ovarian (C), in Esophagus relative to normal tissue (D), in Prostate cancer relative to normal prostate (E), in Melanoma relative to normal tissue (F).

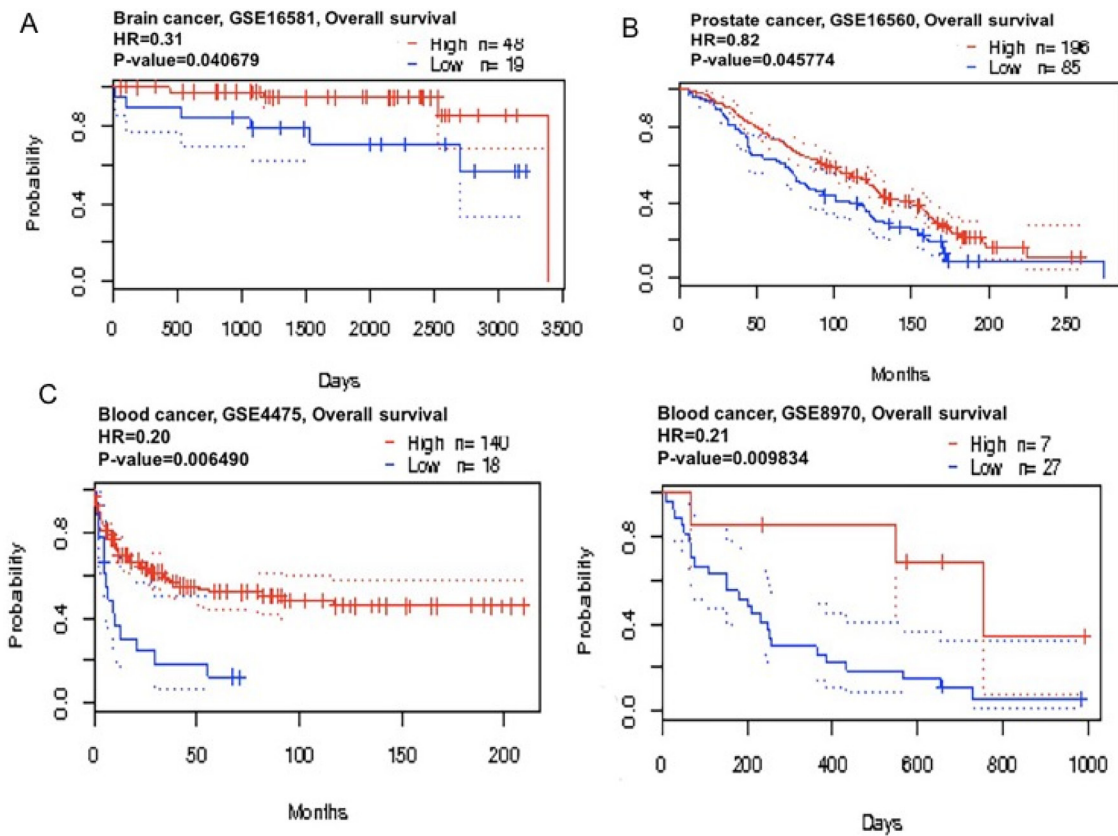

**Supplementary Figure 8: CAP2 genes in Brain, Prostate and Blood cancer (PrognScan database).** The survival curve comparing the patient with high (red) and low (black) expression in brain, prostate and blood cancer were plotted from PrognScan database as the threshold of cox *p*-value < 0.05.

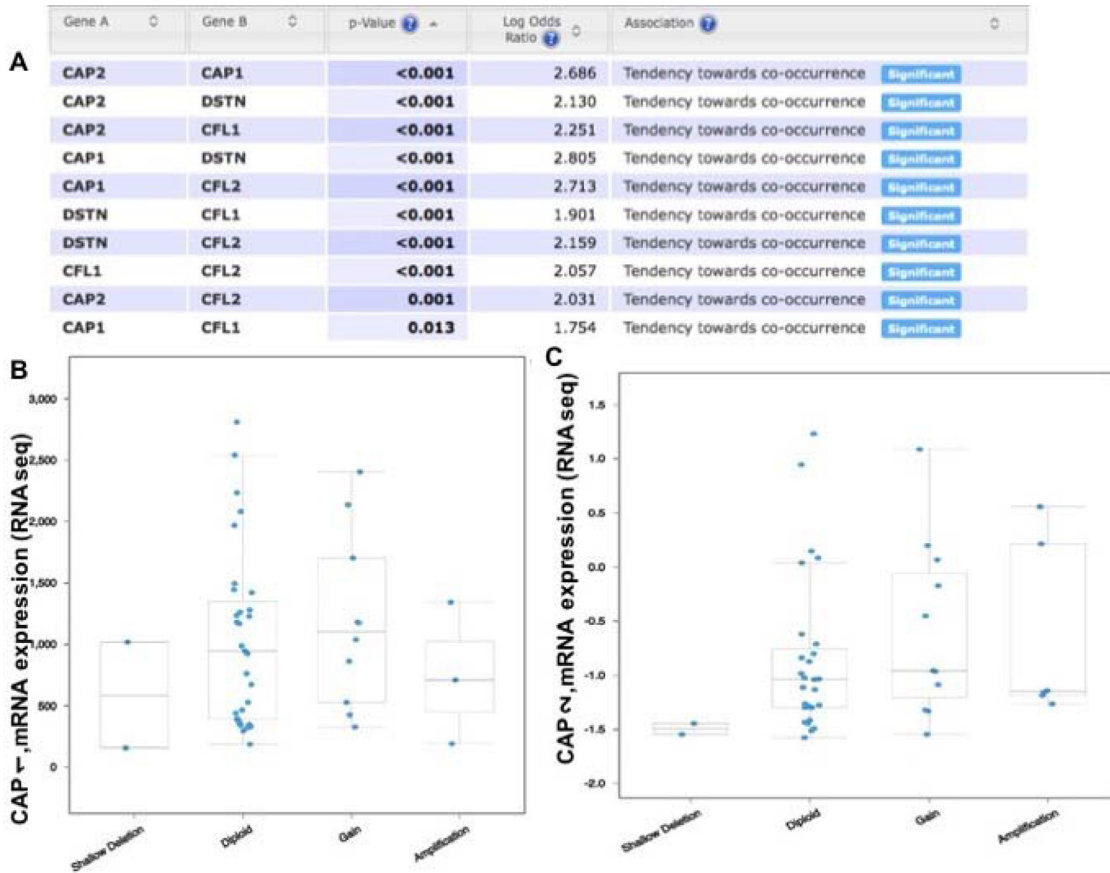

**Supplementary Figure 9: The example shows that genes that alter CAP1, CAP2 in Prostate have a tendency toward co-occurrence.** The  $P$  values are determined by a Fisher's exact test,  $P < 0.05$  (A). A plot showing the relationship between CAP1, CAP2 mRNA abundance and CNA in the CAP1, CAP2 gene in tumors from the selected cancer study (B, C). The "x"s indicate individual tumors, and the circles indicate tumors with missense mutations. Homdel, homozygously deleted; Hetloss, heterozygously deleted; Diploid, two alleles present; Gain, low-level gene amplification event; Amp, high-level gene amplification event; Mutated, nonsynonymous mutation; Normal, no mutation or CNA present.



### Estilo, Head-Neck

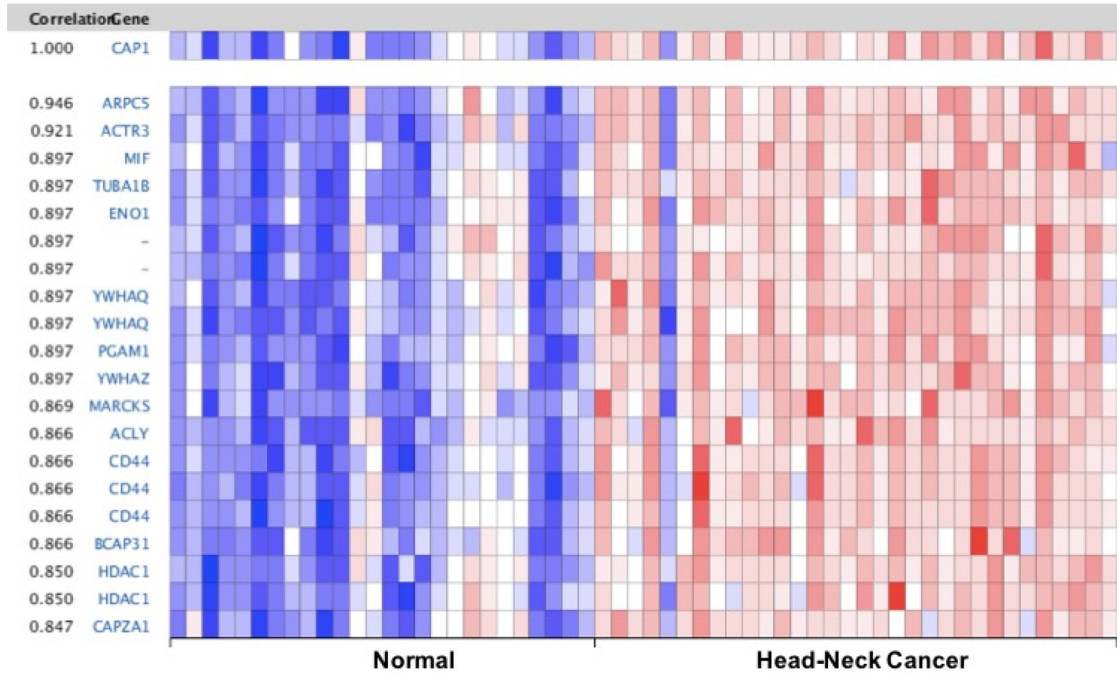

**Supplementary Figure 10: CAP1 genes in Head-Neck cancer.** CAP1 is coexpressed with the indicated 52 genes across a panel of 32 Head-Neck and 26 normal Head-Neck samples. Bar length represented the significance and negative logarithm of enrichment  $p$ -value.

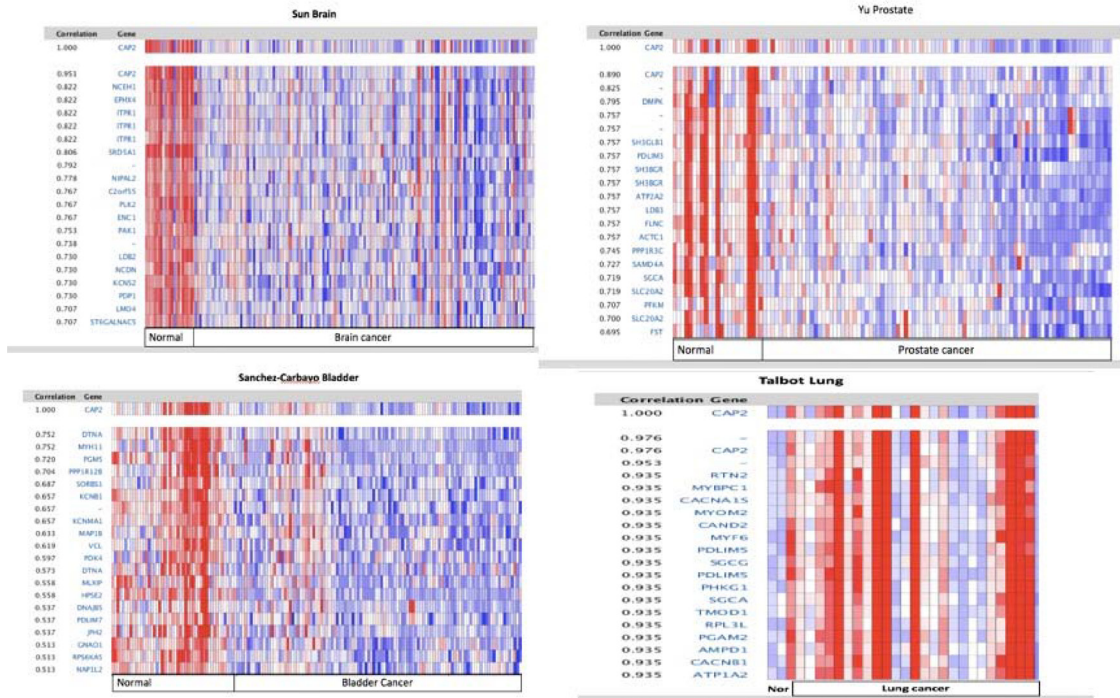

**Supplementary Figure 11: CAP2 genes in Brain, Prostate, Bladder and Lung cancer.** CAP2 is coexpressed with the indicated 513 genes across a panel of 157 Brain and 23 normal Brain samples, 521 genes across a panel of 89 Prostate and 23 normal prostate samples, 1051 genes across a panel of 109 Bladder and 48 normal bladder samples, 35 genes across a panel of 65 Lung and 28 normal lung samples. Bar length represented the significance and negative logarithm of enrichment  $p$ -value.

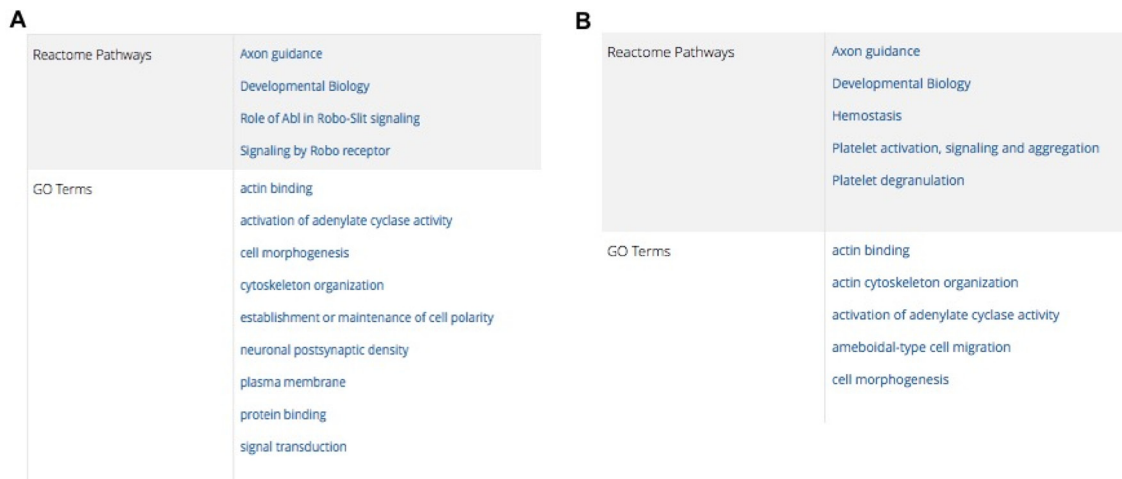

**Supplementary Figure 12:** The potential pathway and GO processes were visualized by ICGC Data Portal with CAP1(A) and CAP2 (B).

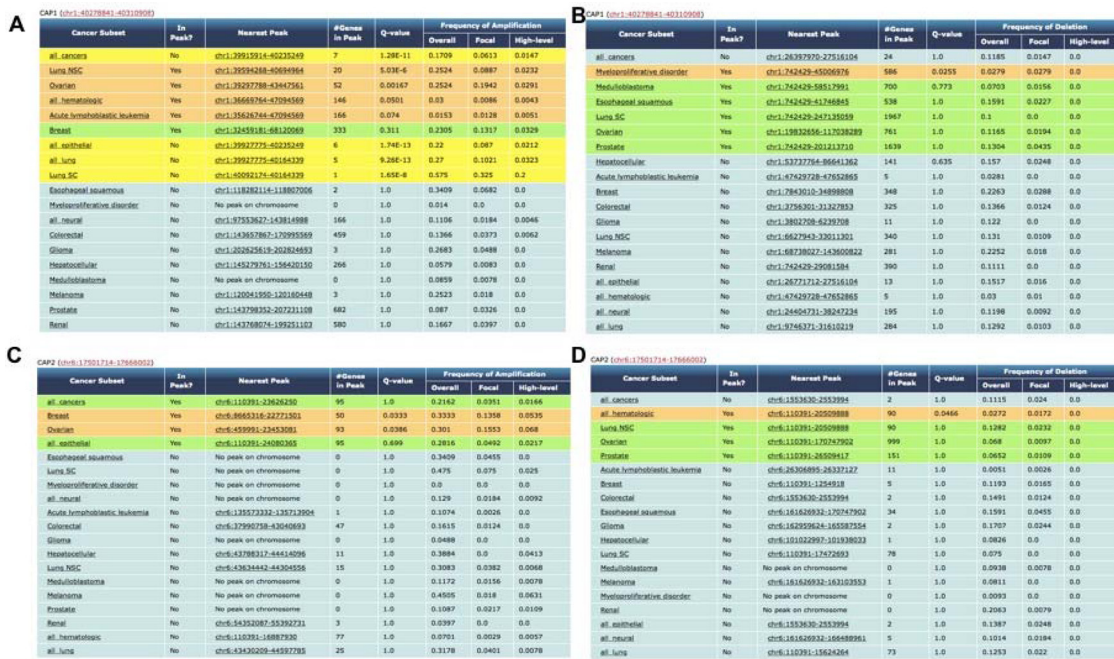

**Supplementary Figure 13: Examples of Tumorscape data analysis and visualization.** (A–B) shows that CAP1 was most frequently amplified and deletion in lung, ovarian, breast, prostate, leukemia cancer; (C–D) shows that CAP2 was most frequently amplified and deletion in lung, ovarian, prostate, breast cancer; The *q*-value represents the likelihood of a random occurrence of the specific amplification/deletion that is calculated based on the background copy number variation. The table depicts a list of cancers in which the representative gene (*CAP1*, *CAP2*) is located in or near the frequently amplified region (orange and yellow rows, respectively).
